# Supplementary material for: Species with negative electron affinity and standard DFT methodsElectronic supplementary information (ESI) available: (i) Details of calculations (total energies, zero point corrections, etc.) and correlations obtained with different basis sets. (ii) Color graphics: structure, dipole, SOMO diagram and spin densities. (iii) xyz coordinates of all species. See http://www.rsc.org/suppdata/cp/b4/b403898c/
Source: Royal Society of Chemistry journal article supplement (doi:10.1039/b403898c), 2004-01-01
Supplement: b403898c.pdf [file b403898c.pdf]

# Species with negative electron affinity and standard DFT methods

D. Mariano A. Vera and Adriana B. Pierini\*

## Supplementary Material

---

### *Part 1. Calculation Details*

**Table S1. Detailed results with 6-31+G\* and 6-311+G(2df,p) basis sets\***

| species                        | type | B3LYP/6-31+G* |       |            |        |                   | B3LYP/6-311+G(2df,p) // B3LYP/6-31+G* |        |        |        |            |                   |           |        |        |
|--------------------------------|------|---------------|-------|------------|--------|-------------------|---------------------------------------|--------|--------|--------|------------|-------------------|-----------|--------|--------|
|                                |      | $\mu$         | LVUMO | E(neutral) | ZPE    | E(vertical anion) | E(anion)                              | ZPE    | VEA    | AEA    | E(n)       | E(vertical anion) | E(anion)  | VEA    | AEA    |
| 1 1,1-dichloroethylene         | V    | 1.51          | -0.95 | -997.7811  | 0.0336 | -997.7453         |                                       |        |        |        |            |                   |           |        |        |
| 2 1,3-cyclohexadiene           | V    | 0.49          | -0.91 | -233.4288  | 0.1225 | -233.3924         |                                       |        |        |        |            |                   |           |        |        |
| 3 acetaldehyde                 | V    | 2.99          | -1.08 | -153.8397  | 0.0557 | -153.7893         |                                       |        |        |        |            |                   |           |        |        |
| 4 adenine                      | V    | 2.46          | -0.92 | -467.3399  | 0.1120 | -467.3100         |                                       |        |        |        |            |                   |           |        |        |
| 5 bromobenzene                 | V    | 1.85          | -0.79 | -2803.3846 |        | -2803.3498        |                                       |        |        |        |            |                   |           |        |        |
| 6 butadiene                    | V    | 0.00          | -1.10 | -156.0011  | 0.0852 | -155.9700         |                                       |        |        |        |            |                   |           |        |        |
| 7 chlorobenzene                | V    | 1.89          | -0.78 | -691.8549  |        | -691.8149         |                                       |        |        |        |            |                   |           |        |        |
| 8 chloroethylene               | V    | 1.59          | -0.59 | -538.1910  | 0.0428 | -538.1390         |                                       |        |        |        |            |                   |           |        |        |
| 9 chloroform                   | V    | 1.25          | -1.62 | -1419.2843 | 0.0199 | -1419.2720        |                                       |        |        |        |            |                   |           |        |        |
| 10 cis-dichloroethylene        | V    | 2.02          | -0.76 | -997.7843  | 0.0342 | -997.7348         |                                       |        |        |        |            |                   |           |        |        |
| 11 cyclopentyl radical         | V    | 0.20          | 5.44  | -195.9017  | 0.1261 | -195.8723         | -195.8892                             | 0.1233 | -0.799 | -0.263 | -195.9572  | -195.9315         | -195.9473 | -0.698 | -0.192 |
| 12 cytosine                    | V    | 6.85          | -1.32 | -394.9498  | 0.0984 | -394.9266         | -394.9439                             | 0.0944 | -0.631 | -0.051 | -395.0752  | -395.0550         | -395.0687 | -0.547 | -0.068 |
| 13 dimethylaminomethyl radical | V    | 1.33          | -0.86 | -173.8273  | 0.1073 | -173.7962         | -173.8096                             | 0.1042 | -0.845 | -0.399 | -173.8807  | -173.8524         | -173.8643 | -0.768 | -0.364 |
| 14 ethylene                    | V    | 0.00          | -0.22 | -78.5933   | 0.0511 | -78.5281          |                                       |        |        |        | -78.6192   | -78.5565          |           | -1.706 |        |
| 15 ethyl radical               | V    | 0.34          | -1.52 | -79.1629   | 0.0595 | -79.1415          | -79.1492                              | 0.0578 | -0.580 | -0.323 | -79.1879   | -79.1698          | -79.1769  | -0.495 | -0.253 |
| 16 fluorobenzene               | V    | 1.75          | -0.75 | -331.5012  | 0.0924 | -331.4576         | -331.4640                             | 0.0841 | -1.187 | -0.788 | -331.5978  | -331.5577         | -331.5622 | -1.092 | -0.743 |
| 17 isopropyl radical           | V    | 0.25          | -1.20 | -118.4837  | 0.0882 | -118.4547         | -118.4686                             | 0.0860 | -0.791 | -0.352 | -118.5199  | -118.4943         | -118.5068 | -0.698 | -0.296 |
| 18 naphthalene                 | V    | 0.00          | -1.33 | -385.9069  | 0.1476 | -385.8930         | -385.8973                             | 0.1414 | -0.378 | -0.093 | -386.0107  | -386.0003         | -386.0030 | -0.283 | -0.039 |
| 19 norbornadiene               | V    | 0.04          | -0.56 | -271.4878  | 0.1286 | -271.4460         |                                       |        |        |        | -271.5622  | -271.5231         |           | -1.065 |        |
| 20 pyrazine                    | V    | 0.00          | -1.83 | -264.3286  | 0.0769 | -264.3186         | -264.3256                             | 0.0726 | -0.270 | 0.036  | -264.4021  | -264.3946         | -264.4002 | -0.203 | 0.068  |
| 21 pyridazine                  | V    | 4.43          | -1.80 | -264.2989  | 0.0763 | -264.2876         | -264.2954                             | 0.0713 | -0.308 | 0.039  | -264.3725  | -264.3635         | -264.3700 | -0.244 | 0.067  |
| 22 pyridine                    | V    | 2.38          | -1.06 | -248.2958  | 0.0889 | -248.2616         |                                       |        |        |        | -248.3648  | -248.3337         |           | -0.846 |        |
| 23 pyrimidine                  | V    | 2.48          | -1.57 | -264.3351  | 0.0772 | -264.3156         | -264.3230                             | 0.0717 | -0.531 | -0.179 | -264.4087  | -264.3917         | -264.3977 | -0.461 | -0.149 |
| 24 styrene                     | V    | 0.21          | -1.29 | -309.6613  | 0.1335 | -309.6453         |                                       |        |        |        | -309.7477  | -309.7351         |           | -0.342 |        |
| 25 t-buthyl                    | V    | 0.27          | -4.75 | -157.8045  | 0.1169 | -157.7761         | -157.7950                             | 0.1143 | -0.772 | -0.186 | -157.8515  | -157.8264         | -157.8432 | -0.684 | -0.152 |
| 26 thiophene                   | V    | 0.55          | -0.64 | -553.0114  | 0.0667 | -552.9628         |                                       |        |        |        | -553.0895  | -553.0438         |           | -1.242 |        |
| 27 thymine                     | V    | 4.63          | -1.54 | -454.1581  | 0.1149 | -454.1444         | -454.1587                             | 0.1102 | -0.372 | 0.145  | -454.3001  | -454.2890         | -454.3004 | -0.301 | 0.137  |
| 28 trans-dichloroethylene      | V    | 0.00          | -0.94 | -997.7839  | 0.0339 | -997.7433         |                                       |        |        |        | -997.8722  | -997.8361         |           | -0.984 |        |
| 29 trichloroethylene           | V    | 0.94          | -1.12 | -1457.3716 | 0.0248 | -1457.3396        |                                       |        |        |        | -1457.4923 | -1457.4652        |           | -0.739 |        |
| 30 uracil                      | V    | 4.67          | -1.68 | -414.8377  | 0.0871 | -414.8246         | -414.8401                             | 0.0827 | -0.355 | 0.184  | -414.9689  | -414.9588         | -414.9708 | -0.274 | 0.172  |
| 31 1,2,4-trimethylbenzene      | NV   | 0.40          | -0.21 | -350.2132  | 0.1836 | -350.1715         | -350.1717                             | 0.1817 | -1.134 | -1.079 | -350.3106  | -350.2735         | -350.2734 | -1.008 | -0.961 |
| 32 acetone                     | NV   | 3.19          | -0.75 | -193.1663  | 0.0838 | -193.1200         |                                       |        |        |        | -193.2267  | -193.1882         |           | -1.048 |        |
| 33 aniline                     | NV   | 1.63          | -0.28 | -287.6161  | 0.1171 | -287.5757         |                                       |        |        |        | -287.7028  | -287.6654         |           | -1.018 |        |
| 34 anisole                     | NV   | 1.39          | -0.37 | -346.7855  | 0.1333 | -346.7440         |                                       |        |        |        | -346.8870  | -346.8512         |           | -0.975 |        |
| 35 cis-butene                  | NV   | 0.03          | 0.33  | -157.2299  | 0.1079 | -157.1767         |                                       |        |        |        | -157.2778  | -157.2341         |           | -1.190 |        |
| 36 cyclohexene                 | NV   | 0.35          | 0.46  | -234.6562  | 0.1466 | -234.6094         |                                       |        |        |        | -234.7231  | -234.6826         |           | -1.101 |        |
| 37 furan                       | NV   | 0.73          | -0.07 | -230.0314  | 0.0700 | -229.9794         |                                       |        |        |        | -230.1010  | -230.0560         |           | -1.226 |        |
| 38 m-xylene                    | NV   | 0.36          | -0.29 | -310.8956  | 0.1554 | -310.8554         |                                       |        |        |        | -310.9822  | -310.9457         |           | -0.992 |        |
| 39 o-xylene                    | NV   | 0.67          | -0.20 | -310.8950  | 0.1562 | -310.8510         |                                       |        |        |        | -310.9815  | -310.9431         |           | -1.046 |        |
| 40 phenol                      | NV   | 1.42          | -0.48 | -307.4803  | 0.1045 | -307.4399         |                                       |        |        |        | -307.5753  | -307.5388         |           | -0.994 |        |
| 41 propene                     | NV   | 0.43          | 0.10  | -117.9139  | 0.0798 | -117.8548         |                                       |        |        |        | -117.9509  | -117.9020         |           | -1.328 |        |
| 42 pyrrole                     | NV   | 1.93          | 0.65  | -210.1778  | 0.0825 | -210.1375         |                                       |        |        |        | -210.2417  | -210.2060         |           | -0.973 |        |
| 43 trans-butene                | NV   | 0.00          | 0.42  | -157.2336  | 0.1081 | -157.1792         |                                       |        |        |        | -157.2815  | -157.2301         |           | -1.397 |        |
| 44 trimethylethylene           | NV   | 0.31          | 0.37  | -196.5480  |        | -196.4992         |                                       |        |        |        | -196.6068  | -196.5657         |           | -1.117 |        |
| 45 CO2                         | NV   | 0.00          | -0.56 | -188.5904  | 0.0116 | -188.5565         | -188.5805                             | 0.0083 | -0.921 | -0.182 | -188.6569  | -188.6233         | -188.6415 | -0.915 | -0.332 |
| 46 guanine                     | NV   | 6.80          | -0.58 | -542.5764  | 0.1168 | -542.5606         | -542.5621                             | 0.1139 | -0.431 | -0.311 | -542.7433  | -542.7286         | -542.7297 | -0.400 | -0.291 |

\* Dipole moment in Debyes, LVUMO energy in eV, Energies in Hartrees, VEA and AEA in eV

\* Dipole moment in Debyes, LVUMO energy in eV, Energies in Hartrees, VEA and AEA in eV

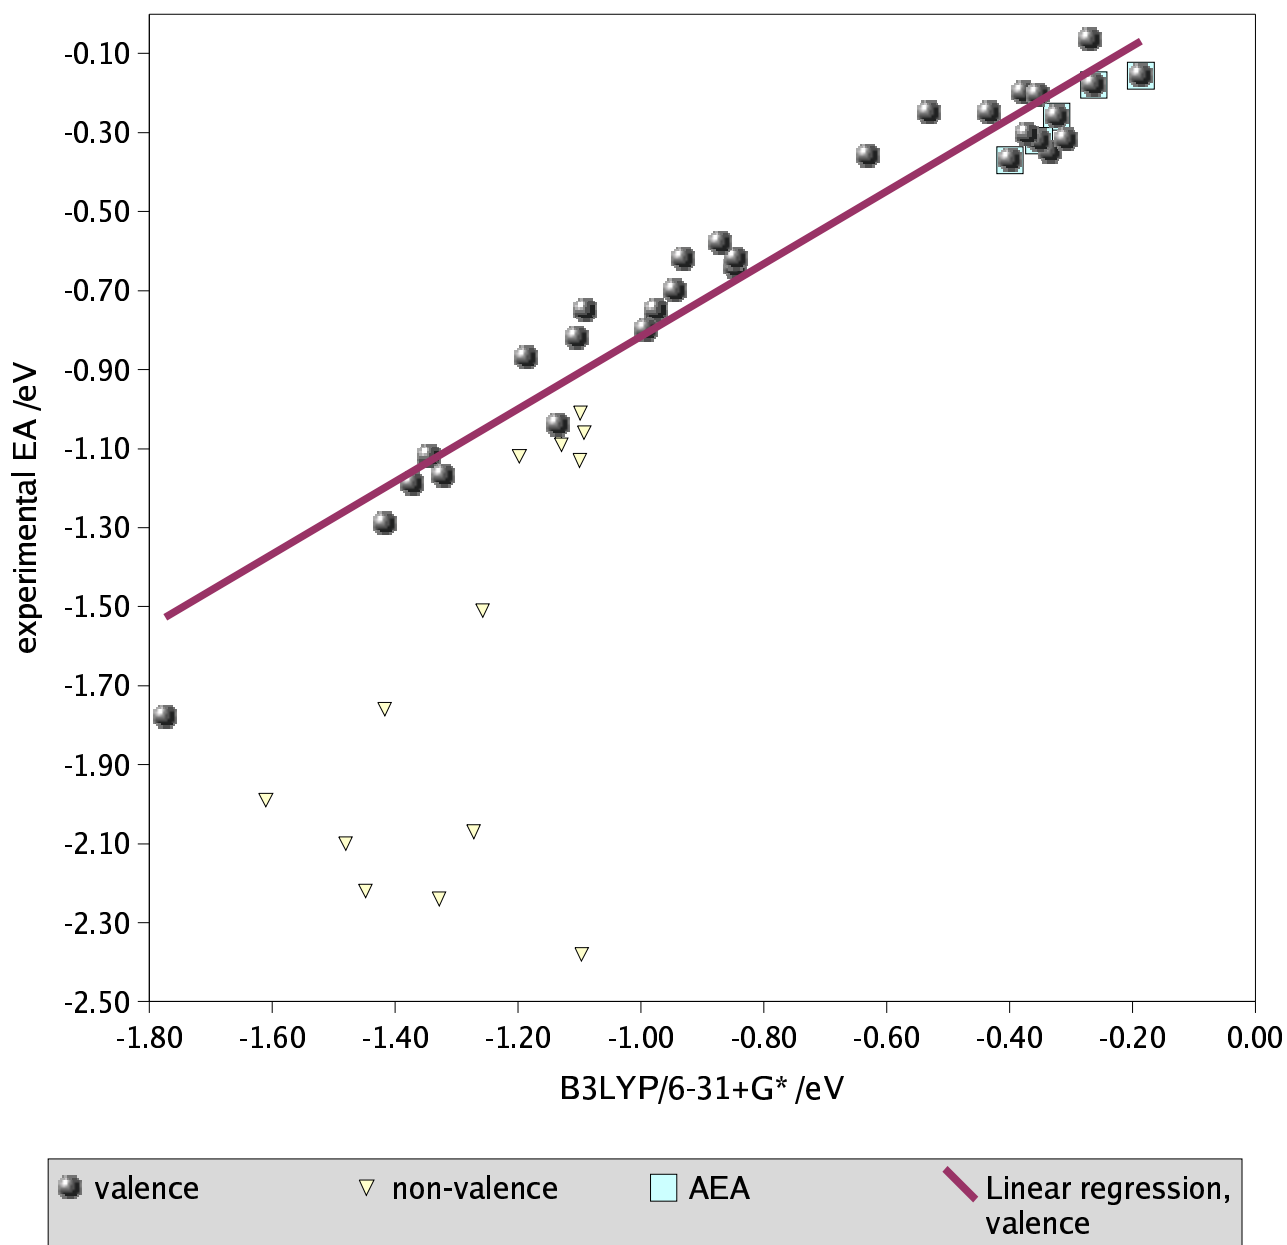

Figure S1. Correlation between the experimental and B3LYP/6-31+G\* data. See text and Figure 1.

| Table S2. Detailed results with AUG-CC-PVDZ and AUG-CC-PVTZ basis sets* |      |       |       |                   |        |                   |            |        |                                        |        |        |                   |            |            |     |       |        |
|-------------------------------------------------------------------------|------|-------|-------|-------------------|--------|-------------------|------------|--------|----------------------------------------|--------|--------|-------------------|------------|------------|-----|-------|--------|
| species                                                                 | type | $\mu$ | LVUMO | B3LYP/AUG-cc-pVDZ |        |                   |            |        | B3LYP/AUG-CC-PVTZ // B3LYP/AUG-CC-PVDZ |        |        |                   |            |            |     |       |        |
|                                                                         |      |       |       | E(neutral)        | ZPE    | E(vertical anion) | E(anion)   | ZPE    | VEA                                    | AEA    | E(n)   | E(vertical anion) | E(anion)   | VEA        | AEA |       |        |
| 1 1,3-cyclohexadiene                                                    | V    | 0.50  | -1.01 | -233.4449         | 0.1216 | -233.4261         |            |        |                                        |        | -0.511 |                   | -233.5067  | -233.4916  |     |       | -0.411 |
| 9 chloroform                                                            | V    | 1.11  | -1.55 | -1419.3600        | 0.0196 | -1419.3492        |            |        |                                        |        | -0.293 |                   | -1419.4135 | -1419.4046 |     |       | -0.243 |
| 11 cyclopentyl radical                                                  | V    | 0.19  |       | -195.9147         | 0.1249 | -195.8921         | -195.9085  | 0.1224 |                                        | -0.614 | -0.098 | -195.9678         | -195.9469  | -195.9609  |     |       | -0.567 |
| 13 dimethylaminomethyl radical                                          | V    | 1.30  |       | -173.8398         | 0.1059 | -173.8189         | -173.8276  | 0.1030 |                                        | -0.568 | -0.252 | -173.8902         | -173.8711  | -173.8776  |     |       | -0.519 |
| 15 ethyl radical                                                        | V    | 0.32  |       | -79.1668          | 0.0588 | -79.1495          | -79.1576   | 0.0568 |                                        | -0.470 | -0.194 | -79.1929          | -79.1772   | -79.1837   |     |       | -0.428 |
| 17 isopropyl radical                                                    | V    | 0.17  |       | -118.4897         | 0.0870 | -118.4684         | -118.4803  | 0.0850 |                                        | -0.578 | -0.200 | -118.5271         | -118.5074  | -118.5172  |     |       | -0.535 |
| 23 pyrimidine                                                           | V    | 2.38  | -1.62 | -264.3566         | 0.0767 | -264.3393         |            |        |                                        | -0.469 |        | -264.4194         | -264.4071  |            |     |       | -0.335 |
| 24 styrene                                                              | V    | 0.20  | -1.38 | -309.6830         | 0.1330 | -309.6705         |            |        |                                        | -0.339 |        | -309.7624         | -309.7509  |            |     |       | -0.311 |
| 25 t-butyl                                                              | V    | 0.19  |       | -157.8125         | 0.1154 | -157.7953         | -157.8085  | 0.1127 |                                        | -0.467 | -0.037 | -157.8608         | -157.8449  | -157.8560  |     |       | -0.431 |
| 3 acetaldehyde                                                          | NV   | 2.91  | -1.15 | -153.8532         | 0.0550 | -153.8342         |            |        |                                        | -0.517 |        | -153.8962         | -153.8812  |            |     |       | -0.408 |
| 32 acetone                                                              | NV   | 3.11  | -0.81 | -193.1816         | 0.0827 | -193.1664         | -193.1665  | 0.0814 |                                        | -0.414 | -0.375 | -193.2359         | -193.2238  | -193.2236  |     |       | -0.328 |
| 33 aniline                                                              | NV   | 1.57  | -0.40 | -287.6438         | 0.1164 | -287.6289         |            |        |                                        | -0.405 |        | -287.7167         | -287.7052  |            |     |       | -0.313 |
| 34 anisole                                                              | NV   | 1.31  | -0.49 | -346.8126         | 0.1323 | -346.7962         |            |        |                                        | -0.445 |        | -346.9028         | -346.8900  |            |     |       | -0.347 |
| 5 bromobenzene                                                          | NV   | 1.86  | -0.91 | -2805.8307        | 0.0900 | -2805.8160        | -2805.8438 | 0.0865 |                                        | -0.398 | 0.453  | -2805.9609        | -2805.9494 | -2805.9715 |     | 0.385 | -0.311 |
| 6 butadiene                                                             | NV   | 0.00  | -1.19 | -156.0121         | 0.0849 | -155.9875         |            |        |                                        | -0.669 |        | -156.0569         | -156.0380  |            |     |       | -0.517 |
| 7 chlorobenzene                                                         | NV   | 1.89  | -0.87 | -691.8948         | 0.0906 | -691.8786         | -691.8788  | 0.0892 |                                        | -0.442 | -0.398 | -691.9672         | -691.9544  | -691.9542  |     |       | -0.349 |
| 35 cis-butene                                                           | NV   | 0.31  | 0.19  | -157.2389         | 0.1068 | -157.2188         |            |        |                                        | -0.546 |        | -157.2868         | -157.2704  |            |     |       | -0.444 |
| 36 cyclohexene                                                          | NV   | 0.37  | 0.38  | -234.6720         | 0.1454 | -234.6535         |            |        |                                        | -0.504 |        | -234.7354         | -234.7205  |            |     |       | -0.405 |
| 14 ethylene                                                             | NV   | 0.00  | -0.34 | -78.5984          | 0.0508 | -78.5719          | -78.5719   | 0.0503 |                                        | -0.720 |        | -78.6237          | -78.6029   | -78.6028   |     |       | -0.568 |
| 16 fluorobenzene                                                        | NV   | 1.62  | -0.85 | -331.5256         | 0.0918 | -331.5078         | -331.5080  | 0.0908 |                                        | -0.484 | -0.454 | -331.6124         | -331.5982  | -331.5981  |     |       | -0.386 |
| 37 furan                                                                | NV   | 0.67  | -0.20 | -230.0517         | 0.0695 | -230.0304         |            |        |                                        | -0.581 |        | -230.1114         | -230.0942  |            |     |       | -0.467 |
| 19 norbornadiene                                                        | NV   | 0.09  | -0.66 | -271.5072         | 0.1276 | -271.4881         |            |        |                                        | -0.520 |        | -271.5751         | -271.5597  |            |     |       | -0.420 |
| 40 phenol                                                               | NV   | 1.27  | -0.60 | -307.5119         | 0.1043 | -307.4969         |            |        |                                        | -0.408 |        | -307.5897         | -307.5780  |            |     |       | -0.317 |
| 41 propene                                                              | NV   | 0.43  | -0.03 | -117.9209         | 0.0791 | -117.8981         | -117.8982  | 0.0785 |                                        | -0.620 | -0.600 | -117.9576         | -117.9390  | -117.9389  |     |       | -0.507 |
| 22 pyridine                                                             | NV   | 2.28  | -1.14 | -248.3142         | 0.0883 | -248.2980         |            |        |                                        | -0.440 |        | -248.3756         | -248.3630  |            |     |       | -0.343 |
| 42 pyrrole                                                              | NV   | 1.84  | 0.52  | -210.1982         | 0.0822 | -210.1820         |            |        |                                        | -0.441 |        | -210.2518         | -210.2392  |            |     |       | -0.345 |
| 43 trans-butene                                                         | NV   | 0.00  | 0.28  | -157.2425         | 0.1070 | -157.2201         |            |        |                                        | -0.610 |        | -157.2903         | -157.2720  |            |     |       | -0.497 |
| 44 trimethylethylene                                                    | NV   | 0.29  | 0.28  | -196.5592         | 0.1341 | -196.5401         |            |        |                                        | -0.519 |        | -196.6178         | -196.6023  |            |     |       | -0.420 |
| 30 uracil                                                               | NV   | 4.54  | -1.74 | -414.8843         | 0.0868 | -414.8805         | -414.8813  | 0.0856 |                                        | -0.102 | -0.046 | -414.9845         | -414.9831  | -414.9834  |     |       | -0.038 |
| 45 CO2                                                                  | NV   | 0.00  | -0.53 | -188.6142         | 0.0116 | -188.5812         |            |        |                                        | -0.898 |        | -188.6632         | -188.6355  |            |     |       | -0.754 |

\* Dipole moment in Debyes, LVUMO energy in eV, Energies in Hartrees, VEA and AEA in eV

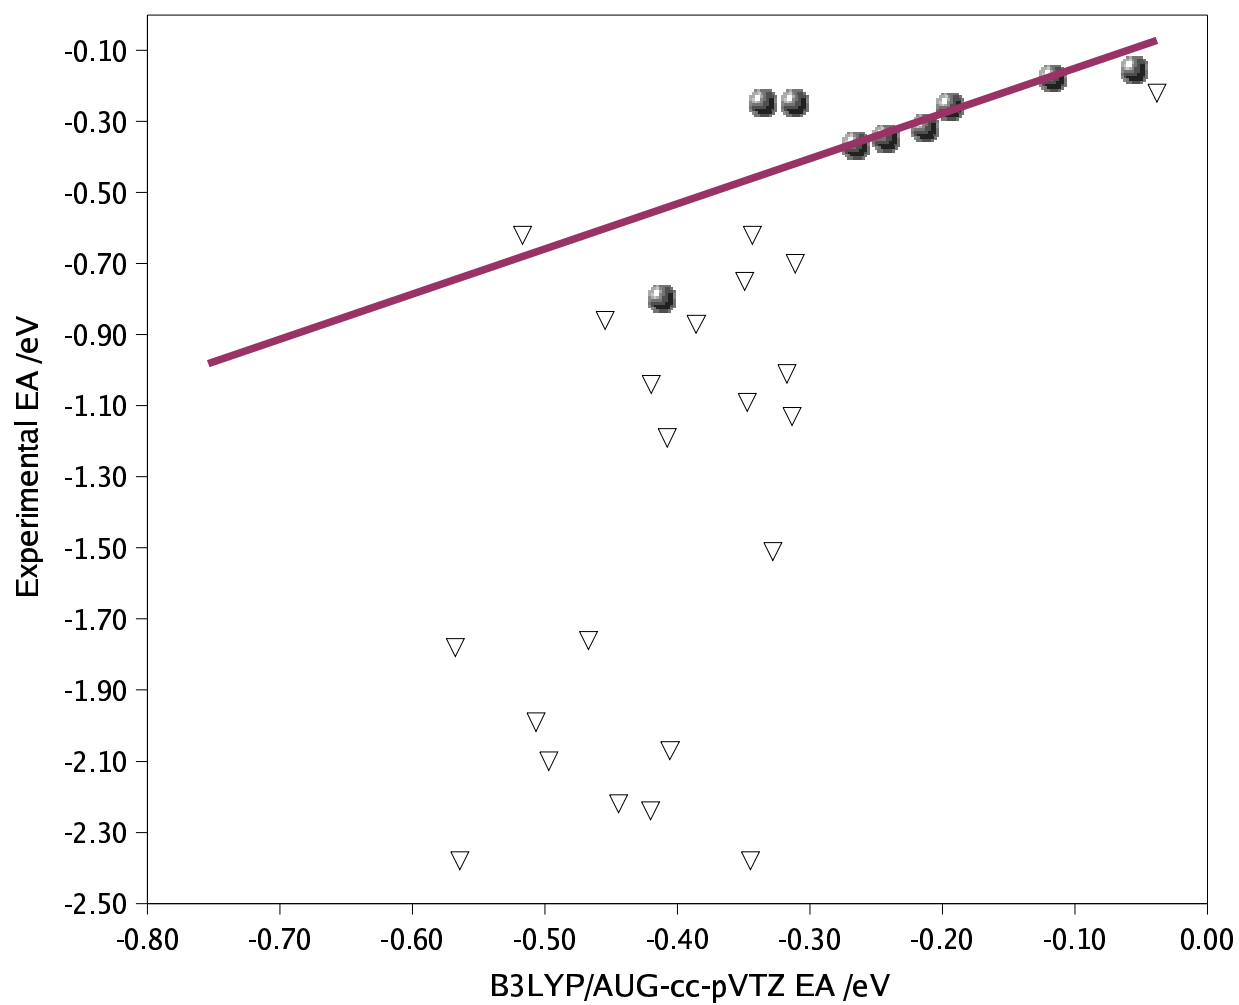

**Figure S2.** Correlation between experimental and calculated electron affinities (B3LYP/AUG-cc-pVTZ basis). Same as figure S1.

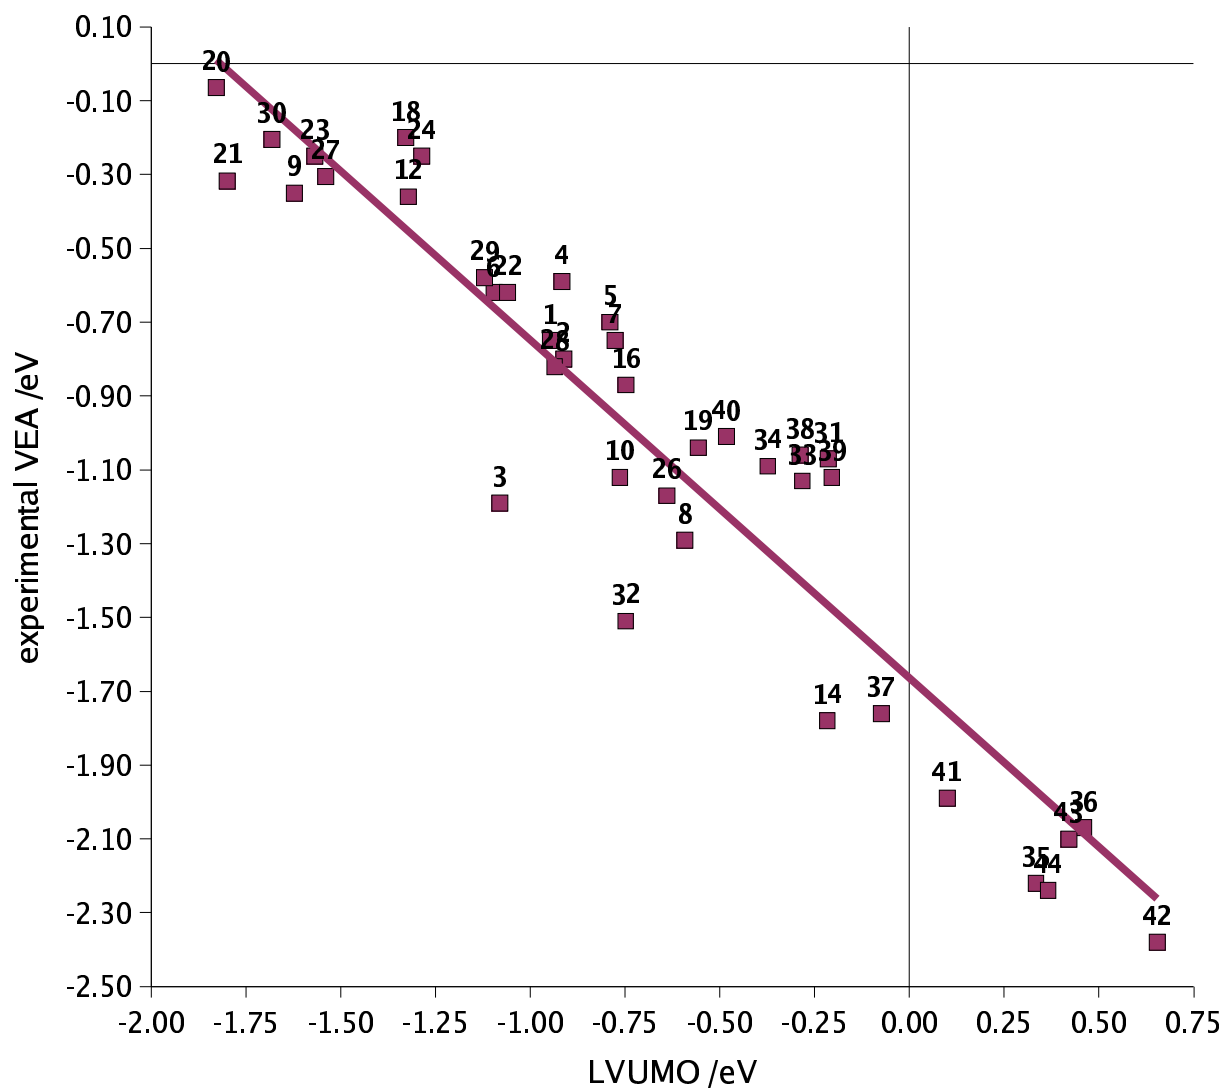

**Figure S3.** Koopman's Theorem correlation at the B3LYP/6-31+G\* level.

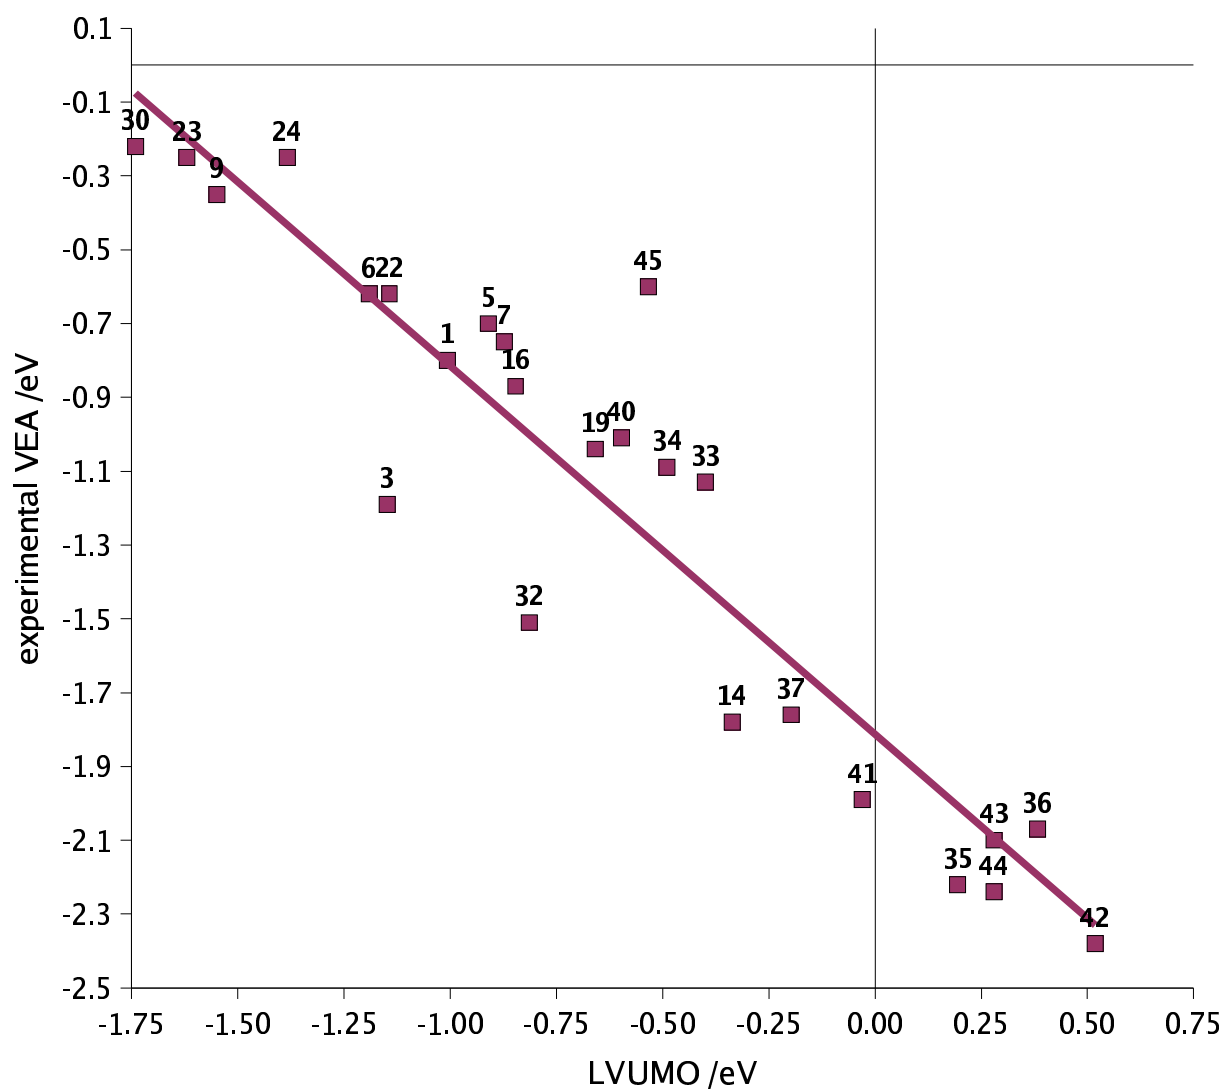

**Figure S4.** Koopman's Theorem correlation at the B3LYP/AUG-cc-pVDZ level.

*Part 2. Structure, Dipole, SOMO diagrams and spin density of some species under study*

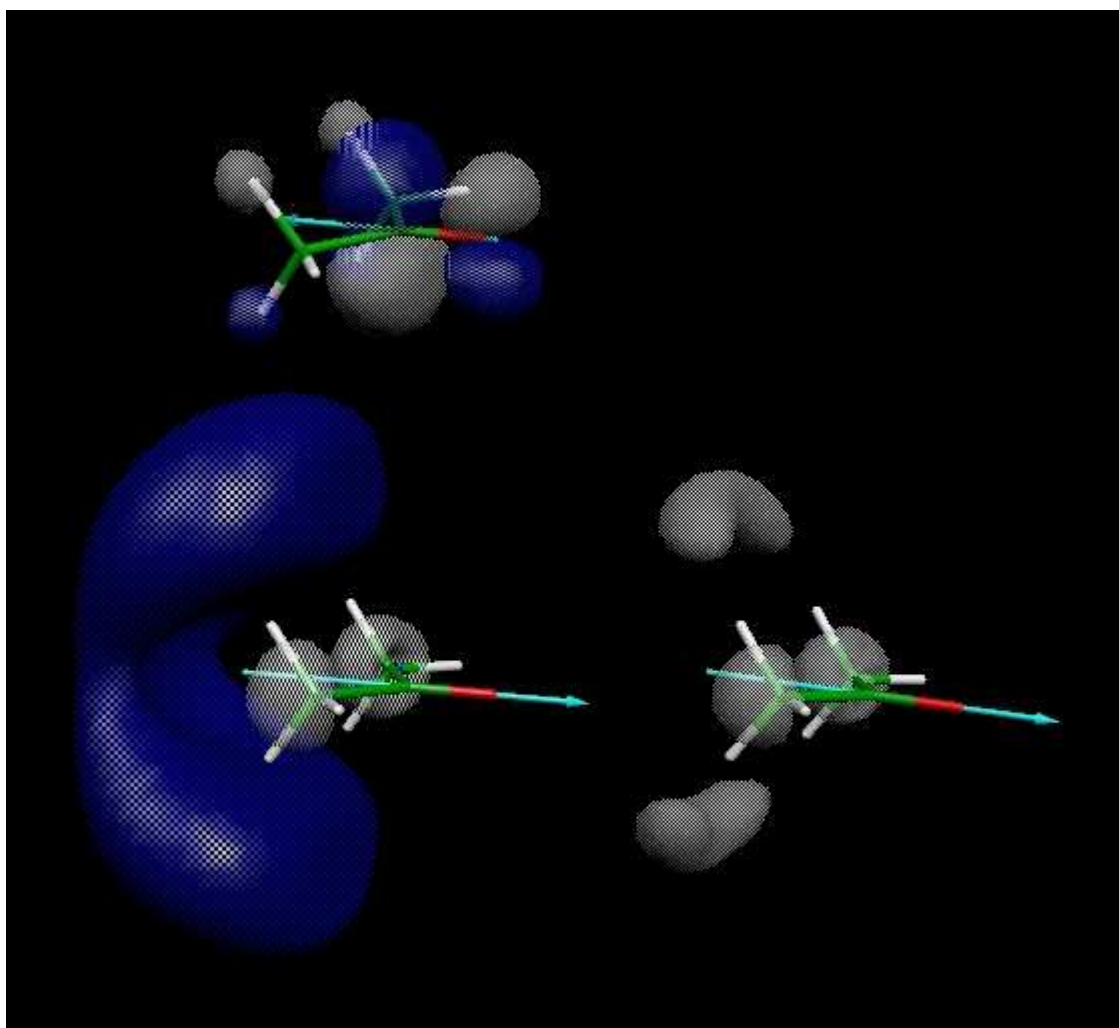

**Figure S5.** Acetone B3LYP/6-31+G\*, Non -Valence RA. Top: LUMO of the neutral. Lower left corner: SOMO of the vertical RA. Lower right corner: spin density. The cyan arrow show the dipole orientation.



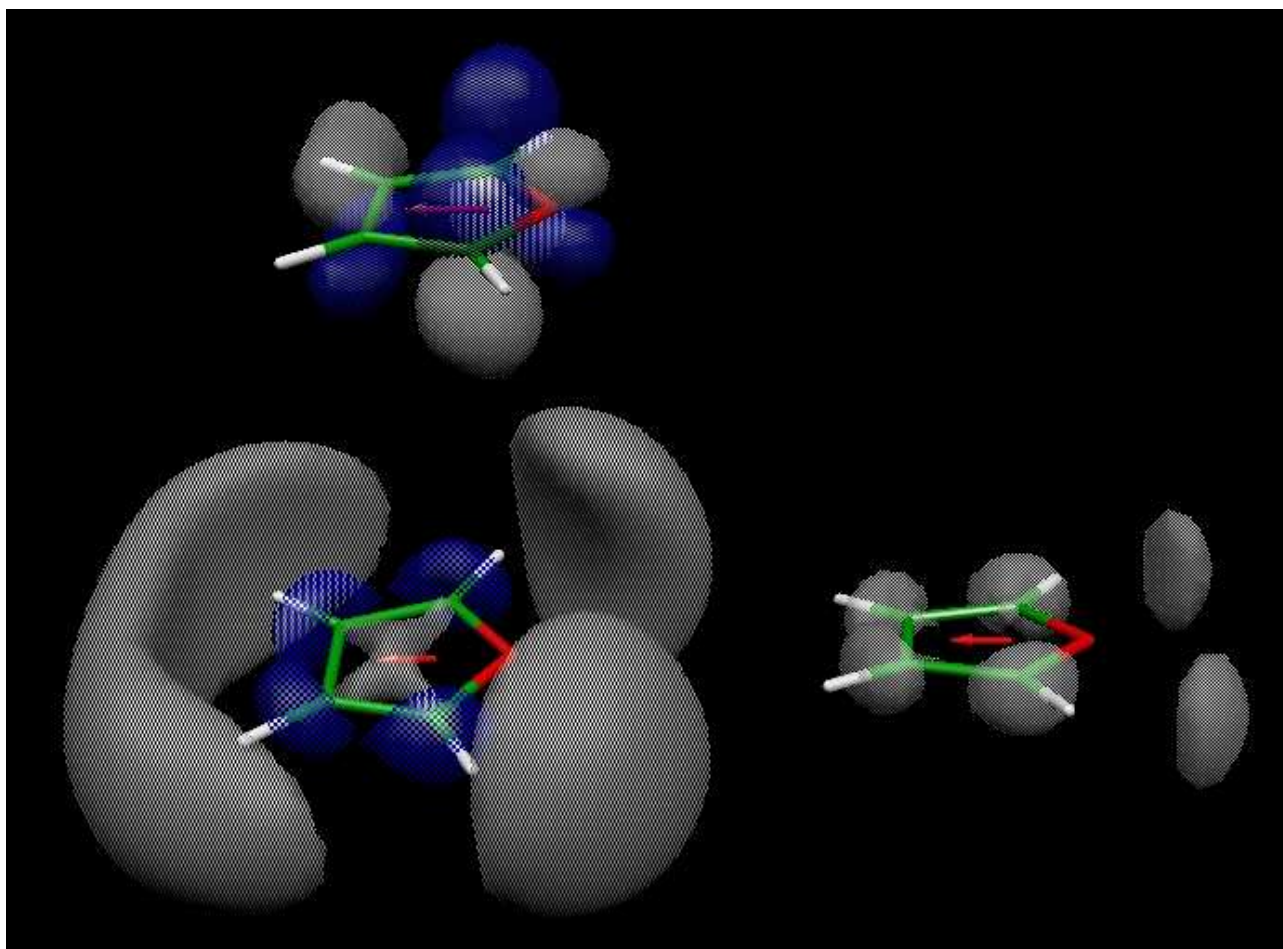

**Figure S6.** Neutral and non valence RA obtained at the B3LYP/6-31+G\* level for furan presented as in figure S5.

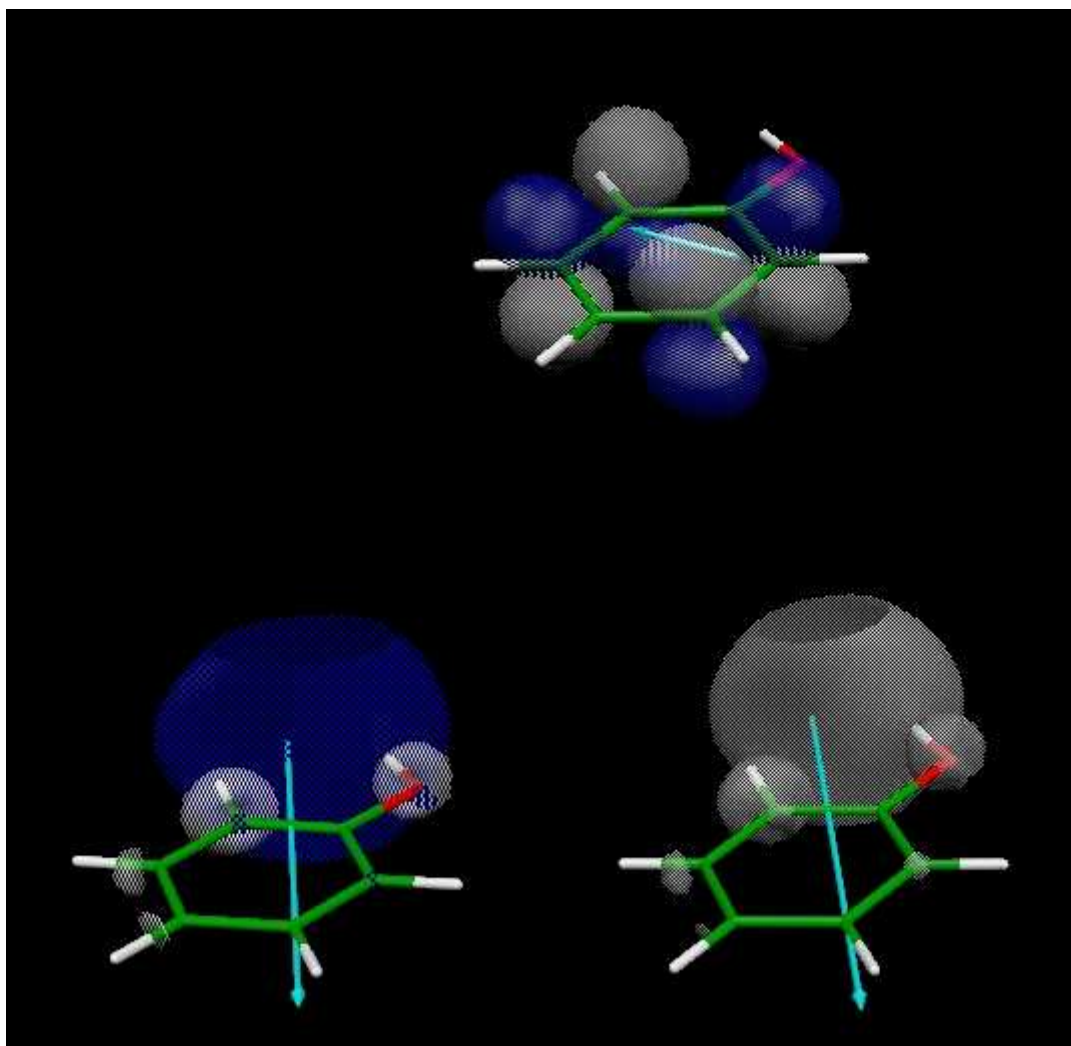

**Figure S7.** Non valence RA found for phenol (organized as Fig. S5).

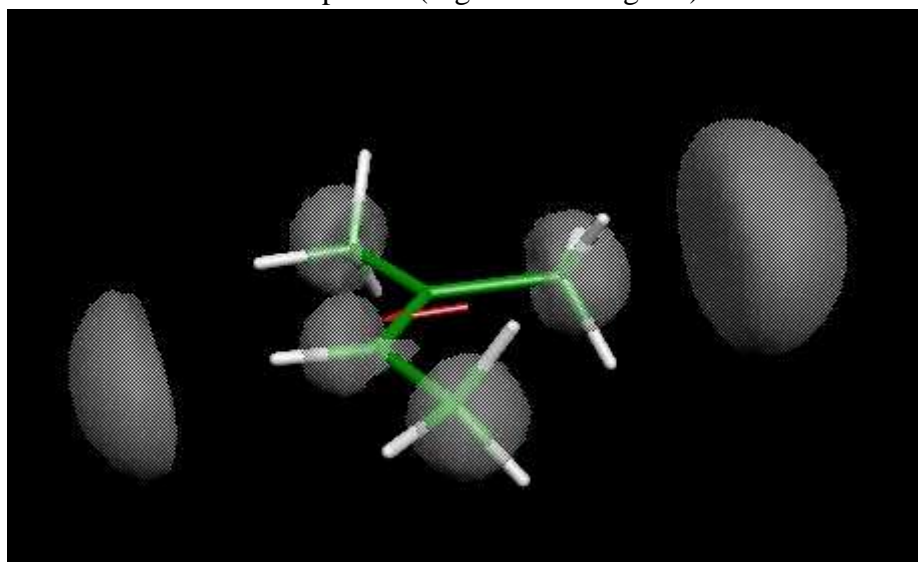

**Figure S8.** Spin density in the trimethylethylene RA.

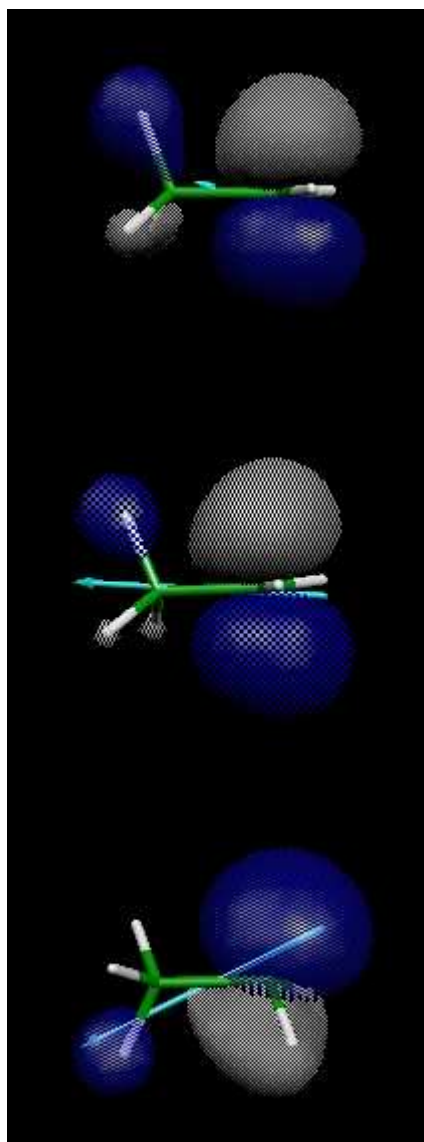

**Figure S9.** Ethyl radical and its anions. From top to bottom, SOMO of the neutral, HOMO of the vertical anion and HOMO of the optimized anion.

***Part 3. Geometries of all species under study.***

All the XYZ coordinates in Angstroms for all the optimized species under study have been gathered in a single ASCII file named Structures-xyz.txt
